# Supplementary material for: Identification and targeting of treatment resistant progenitor populations in T-cell Acute Lymphoblastic Leukemia
Source: Research Square preprint supplement (doi:10.21203/rs.3.rs-3487715/v1), 2023-10-30
Supplement: Supplementary file 1 [file 03b124bf503b41e0260a3365.docx]

**Supplementary Methods**

**scRNA/CITE-seq data processing**

Demultiplexing and alignment of RNA and antibody-derived tag (ADT) sequences were performed with cellranger v3.1.0. Low quality cells and RBC were then filtered by retaining only those cells with between 300 and 2,500 genes in the scRNA-Seq data, greater than 1,500 RNA counts, less than 10% mitochondrial RNA, and less than 3 UMI mapping to Hemoglobin B. To remove cell doublets in scRNA data, DoubletFinder1 v2.0.3 was run with 5% of expected rate of doublets. Patient cell x gene and cell x ADT count matrices were individually saved and subsequently concatenated using Seurat 4.0.52 for downstream analyses. Certain analyses, particularly those that attempt to delineate cell phenotypes associated with treatment response, were completed with (1) equal number of cells from each patient (2) comparison of cells in the same cell cycle phase. For these analyses, cell x gene and cell x ADT matrices for each patient were subset for G1 cells (representing the phenotype most resistant to conventional therapy) and were downsampled to match the lowest value in the cohort. As an example, in differential expression comparison of BMP-like and T-specified cells from 25 non-responding and responding ETP-ALL patients, the input was gene and ADT expression for 42,775 non-cycling blasts, representing 1,711 non-cycling blasts per patient.

**scATAC-seq data processing**

Demultiplexing of scATAC-Seq reads was performed with cellranger-atac v1.1.0, alignment to hg38 and peak calling were performed with BWA3 and MACS24 using the scATAC-pro pipeline5 under default parameters. Low quality cells were filtered for those cells with <3000 (low quality) and >50,000 unique fragments (doublets), <40% reads in peaks (FRIP < 0.4), and > 20% reads mapping to mitochondria.

Certain analyses, such as TF-activity analysis using chromVAR6, required a common peak set amongst samples and an equal cell number from each patient. To make these analyses computationally feasible, the peak x cell matrix size had to be taken into consideration. For each sample, the top 100,000 peaks (defined by MACS2 MapQ score) were selected for downstream merging, alongside 1,500 randomly selected cell barcodes from each patient. We defined two sample sets for merging peaks: one with 25 ETP-ALL patients, and one with 40 T-ALL patients. For each sample set, peaks were merged with the scATAC-pro mergePeaks module, and peak-by-cell matrices with merged peaks and downsampled cell barcodes were reconstructed with the scATAC-pro reConstMtx module. Selection of high-quality peaks and downsampled cell subset (which had equal contribution from each patient) only applied to differential activity analyses requiring a full cell x peak matrix. Analyses done at patient level, such as annotation, projection, and cell state analyses utilized the full peak set and all cells passing QC for each patient.

**Bulk-RNAseq Mapping, quantification and preprocessing**

Sequencing read adapters were removed using Trim Galore (v0.4.4; https://www.bioinformatics.babraham.ac.uk/projects/trim_galore/, -q 20 –phred 33 --paired). Reads were aligned to the human genome GRCh38 using STAR7. The resulting gene counts for each sample were estimated by RSEM8, and combined as gene count matrix. RSEM expected counts were processed and filtered: (1) Samples were required to exhibit expression of over 1 Counts per million (CPM) ≥ 5 samples. (2) Batch correction was performed using the sva R package v3.46 function ComBat_seq. Batches were defined based on library type; stranded and unstranded and based on cohort; TARGET or X01 sequenced samples. (3) DESeq2 R package v1.38.3 vst function was used for data normalization.

**Visualization of Bulk-RNA-seq data**

Raw count matrix output was first transformed into TPM x sample matrix, with transcripts being summarized into genes. To ensure consistency between bulk RNA-seq and scRNA-seq gene annotations, transcript level data were converted to gene level data using the GTF file from scRNA-seq alignment. Genes (n=15732) with expression > 1 counts in >= 50 samples were retained for downstream analyses. For visualization of the full bulk RNA-seq cohort (1335 patients) and 110 bulk-sequenced ETP-ALL patients, dimensionality reduction was performed using Uniform Manifold Approximation and Projection (UMAP) of the top 10 principal components and k=30 neighbors.

**Visualization of CITE-seq data**

Visualization of CITE-seq data utilized a standard dimension reduction approach in Seurat 4.0.5 with one notable modification in trimming genes expressed in <1% of cells during variable feature selection. Gene x cell and ADT x cell matrices for each sample were concatenated, with the product being a matrix of 271,603 cells and 33,560 genes. The *FindVariableFeatures* function (Seurat 4.0.52) was used to identify the top 5,000 features with greater than expected variance. Variable features with expression in >1% of cells were kept as the input to PCA, with subsequent visualization being performed using Uniform Manifold Approximation and Projection (UMAP) of the top 50 principal components and 30 neighbors and 2 principal components.

**Construction of healthy reference trajectory**

Construction of the healthy reference trajectory began with sample-by-sample cell annotation followed by consensus clustering and annotation. Annotations from previously published bone marrow samples were kept9. Cell x gene matrices from each thymus sample were log-normalized and subject to dimensionality reduction. Cells were clustered at multiple resolutions (k=1, k=2, k=3), and clusters given preliminary labels based on marker gene expression. Cell x gene matrices from all thymus donors (n=3) were then concatenated, log-normalized, and subject to dimensionality reduction. Cells were re-clustered at high resolutions (k=3), and clusters relabeled based on marker gene expression and prior labels.

Cell x gene matrices from healthy thymus donors were then concatenated with cell x gene matrices from healthy bone marrow donors (n=5), log-normalized, and subject to dimensionality reduction. Dimensionality reduction was performed using Uniform Manifold Approximation and Projection (UMAP) of the top 25 principal components of the concatenated scRNA-Seq data with 30 neighbors and 2 principal components. The features used for construction of a final working reference trajectory were identified in several iterations. First, the *FindVariableFeatures* function in Seurat was used to identify top 2,000 variable genes. These 2,000 genes were then filtered in two iterations based on Gini coefficient, a previously described method which retains genes of maximal inequality between cell clusters10. Briefly, a shared nearest neighbor graph was constructed using 50 and 20 PCs; cells were clustered at k=0.1 resolution and the Gini coefficient was calculated for each variable gene. Genes with low Gini coefficient (bottom 10% percentile) and cluster level expression < 10% were removed in each iteration, retaining 1,065 features which captured the biology of T-cell maturation. Early T-cells undergo massive proliferation which can skew identification of underlying cell state when projecting patient derived cancer blasts (ie, proliferating cancer blasts will map to proliferating thymocytes based on expression of cell-cycle related genes, rather than developmental stage related genes). To address this, 134 cell cycle related genes previously described in other single cell analyses of thymic tissue11 (total gene set size, n=559) were removed. The remaining 931 variable features were used as input to PCA and UMAP dimension reductions (25 PCs), yielding the final scRNA reference trajectory used for projection of patient data. Trajectory analysis was performed using Slingshot 1.8.012 with HSPC as start cluster and EffectorT, Mature-B, and Monocyte as end clusters for T, B, and Myeloid trajectories, respectively. Principal curves were selected for T-cell trajectory and Myeloid-cell trajectories, and values were scaled based on a maximum of 1 in each curve. To visualize the arrest state of ETP-ALL in context of both Myeloid and T-cell development, values corresponding with states in myeloid development were multiplied by -1. Pseudotime values of shared cell states that occurred in both myeloid and T-cell development (multipotent progenitors: HSPC, LMPP) were then averaged. These transformations yielded a trajectory where multipotent progenitors were centered near 0, myeloid development corresponded with psuedotime values from 0 to -1, and T-cell development corresponded with pseudotime values from 0 to 1.

Cell x peak matrices from healthy bone marrow and thymus donors were reconstructed using a merged set of peaks (see scATAC-seq data processing, above**)** and subsequently concatenated. Annotated scRNA data was used as a reference to annotate thymocyte scATAC data. Gene-activity matrices for single-cell ATAC-Seq were constructed by summing counts within the gene body and 2kb upstream, as previously described9. Integration of scATAC-Seq samples was performed using gene-activity matrices and Seurat v4.0.5 using the default anchor-based CCA method using 30 dimensions, 2,000 anchor features, and k.filter=100. In order to learn labels for scATAC-seq data from scRNA-Seq data, transfer anchors were computed using CCA with scRNA-Seq as the reference, and cell type label transfer was performed on a sample-by-sample basis using the TransferData function. Cell x peak matrices from all thymus donors were then concatenated. Cells were re-clustered at high resolution (k=3), and clusters re-annotated based on consensus labels. To identify parameters for our final working scATAC-seq reference trajectory we sampled peak sets of various sizes (n=3,000, n=7,000, n=10,000, n=15,000) and tested different principal component inputs (n=10, n=20, n=30) for each peak set. Dimensionality reduction was performed using Uniform Manifold Approximation and Projection (UMAP) of the top 10 principal components of the concatenated scATAC-seq data with 30 neighbors and 2 components, with the final dimension reduction selected based on best match to that obtained from scRNA data. Trajectory analysis was performed using Slingshot v1.8.0 with HSPC as start cluster and EffectorT, Mature-B, and Monocyte as end clusters for T, B, and Myeloid trajectories, respectively. Principal curves were selected for T-cell trajectory and Myeloid-cell trajectories, and values were scaled based on a maximum of 1 in each curve. To visualize the arrest state of ETP-ALL in context of both Myeloid and T-cell development, values corresponding with states in myeloid development were multiplied by -1. Pseudotime values of shared cell states that occurred in both myeloid and T-cell development (multipotent progenitors: HSPC, LMPP) were then averaged. These transformations yielded a trajectory where multipotent progenitors were centered near 0, myeloid development corresponded with psuedotime values from 0 to -1, and T-cell development corresponded with pseudotime values from 0 to 1.

**Level 1 annotation of CITE-seq Data**

Distinguishing malignant blasts (ETP, Near-ETP, and Non-ETP) from non-malignant cells in the BM/Peripheral blood (major cell types including T/NK, B, and lympho-myeloid progenitors) in CITE-seq data involved a 7-step process designed to use multiple independent lines of evidence for annotation. Three lines of evidence supported identification and annotation of non-malignant cells captured during live/dead sorting. Firstly, we leveraged the fact that non-malignant cells from different patients would be more similar than cancer blasts arising from different patients. We utilized a cluster-based statistic, Shannon Entropy, to identify clusters of cells at multiple clustering resolutions (k = 1.2, k = 2, k = 3) to identify 4 cell populations which had contribution from every patient. The Shannon Entropy statistic, calculated using the formula , where *p(x)* is the frequency of cells arising from any one patient in any one cluster, ranges from 0 to 1, where 1 represents equal contribution from every patient, and 0 represents 100% contribution from a single patient. As a second line of evidence supporting that these clusters represented non-malignant cells, we concatenated and clustered patient derived single cell data with healthy bone marrow and thymus controls. Clusters with high entropy clustered tightly with healthy thymocytes (T/NK), and bone marrow controls (B, myeloid, lympho-myeloid progenitors). To supplement these two clustering-based methods, we applied a third, single-cell quantitative metric by calculating a similarity score to healthy controls across all patient derived cells. Patient data and healthy control data were co-embedded into a low-dimensional space using the default anchor-based CCA method in Seurat 4.0.5 (30 dimensions, 2,000 anchor features), and k=30 mutual-nearest neighbor score (representing distance between each patient cell and its k=30 nearest anchors in PC space) was assigned for each cell using the *TransferData* function. In support of previous cluster-based scoring, we observed that all non-malignant cell types had high concordance with healthy controls (mean similarity score > 0.95), as compared to cancer blasts (mean similarity score < 0.7).

We utilized four orthogonal lines of evidence to validate preliminary blast annotations obtained above. Firstly, we utilized 22 surface markers along with corresponding non-physiological gene expression to identify cells with ETP, Near-ETP, or Non-ETP blast phenotypes, as defined by the WHO x EHA definition of T-ALL immunophenotype. We also utilized marker gene expression to confidently identify non-malignant cells, which lacked non-physiological marker gene expression combinations. As cancer blasts are defined by the genomic aberrations they harbor, we next utilized *InferCNV* v1.6.013 on a randomly downsampled (1:10) subset of patient data to infer putative, genome-wide copy number variations based on scRNA expression data. InferCNV results showed gross genomic aberrations specifically in T-ALL blasts, with non-malignant B, myeloid and progenitor cells showing no clear patterns of CNV acquisition. In line with genomic instability being a noted feature ETP-ALL, CNVs varied greatly between blasts from different patients. Finally, blast percentages calculated in scRNA were compared to pathology reports of blast percentage obtained from diagnostic aspirate, showing high concordance (mean deviation 3.1%; difference N.S. by paired two-tailed T-test).

**Level 1 annotation of ATAC-seq Data**

ATAC-seq data was annotated using two independent methods. Firstly, annotated scRNA data was used as a reference to annotate patient scATAC data on a paired, sample-by-sample basis. For each patient, gene-activity matrices for single-cell ATAC-Seq were constructed by summing counts within the gene body and 2kb upstream, as previously described2. Integration of scATAC-Seq samples with scRNA data was performed using gene-activity matrices and Seurat v4.2.0 using the default anchor-based CCA method using 30 dimensions, 2,000 anchor features, and k.filter=100. In order to learn labels for scATAC-seq data from scRNA-Seq data, transfer anchors were computed using CCA with scRNA-Seq as the reference, and cell type (T/NK/B/Myeloid/Progenitor/Blast) label transfer was performed on a sample-by-sample basis using the TransferData function. To validate these preliminary annotations learned from scRNA data, we applied a second, single-cell quantitative metric by calculating a similarity score to healthy controls across all patient derived cells. Patient data and healthy control data were co-embedded into a low-dimensional space using the default anchor-based CCA method in Seurat 4.0.5 (30 dimensions, 2,000 anchor features, k.filter = 100), and k=30 mutual-nearest neighbor score (representing distance between each patient cell and its k=30 nearest anchors in PC space) was assigned for each cell using the *TransferData* function. Similar to scRNA data, we observed that non-malignant cell types had high concordance with healthy controls (mean similarity score > 0.95), as compared to cancer blasts (mean similarity score < 0.7). Finally, blast percentages calculated in scATAC were compared to blast percentages calculated in scRNA, showing high concordance (median deviation 1.2%; difference N.S. by paired two-tailed T-test).

**Differential Expression Analyses**

Differential expression analysis on single-cell data was performed using the Wilcoxon rank-sum test with Bonferroni multiple testing correction using sequencing-depth corrected counts. Each analysis was first run with all inputted cells. In the case that 1 or more differentially expressed features had a minimally allowed adjusted p-value based in R (displayed as 0), analyses were re-run with a randomly downsampled cell number by setting the max.cells.per.ident parameter in the *FindMarkers* function (Seurat v4.0.5). For plotting of volcano plots, a pseudocount of 1e-300 was added to the adjusted p-value prior to log transformation.

**Differential Activity Analyses**

For TF motif enrichment analysis, cell x deviation score matrices were generated using the *addGCBias, matchMotifs, getBackgroundPeaks,* and *computeDeviations* functions in chromVAR6 v1.12.0 with hg38 as the reference genome (BSgenome.Hsapiens.UCSC.hg38). Each patient had equal number of cells in the input cell x peak matrices, as described above.

Differential activity analysis was performed using the Wilcoxon rank-sum test with Benjamini-Hochberg multiple testing correction.In the case that 1 or more differentially active motifs had a minimally allowed adjusted p-value based in R (displayed as 0), analyses were re-run with a randomly downsampled cell number in each comparator group. For each motif in any particular comparison, we calculated Δ median chromVAR deviation score, Δ mean chromVAR deviation score, adjusted p-value, % expression of corresponding TF in paired scRNA-seq data, and the ratio of median and mean chromVAR deviation score. DA TF motifs were defined by >0.0025 Δ median chromVAR deviation score, FDR < 0.001, >20% cell expression of corresponding TF, and ratio of median and mean chromVAR deviation score between 0.7 and 1.3 unless otherwise specified.

**Construction of subtype specific TRN**

Our goal was to identify robust enhancer-promoter interactions from integrated scRNA and scATAC-seq data. We used a previously described regression-based meta-cell based approach developed to integrate information from scRNA-Seq and scATAC-Seq data while addressing sparsity in the count matrices9,10,14,15. For each cell in the scRNA-Seq dataset, a scRNA-Seq and scATAC-Seq “meta-cell” was defined by pooling counts for each gene or peak from the 30 nearest neighbors in the principal component space by cosine distance. Meta-cell counts were log-normalized and scaled to zero mean and unit variance. For a gene of interest, we ran a linear regression model using meta-cell gene expression as the dependent variable, and putative enhancer peaks within 500kb of the transcription start site as regressors. Bonferroni adjusted p-values less than 0.01 with a positive coefficient were considered significant. For visualization of the TCF7/LEF1 regulon, TCF7 and LEF1 edges were filtered for regression coefficient > 0.3. Top genes based on differentially expression and biological importance in Near-ETP were visualized in a network. For visualization of TCF7/LEF1 transcriptional repression in ETP-ALL, top edges were selected with edge score > 100, where edge score represents the sum of -log10(p-values) obtained from peak-expression regression. 9 TFs that were found to be DE and DA in ETP-ALL were visualized along with top differentially expressed genes by Log2FC. In each visualization, TFs are represented by squares and genes by circles. The thickness of an edge was set proportional to the -log10(FDR) of the linear regression coefficient in the EP prediction analysis, the color of the gene node was set proportional to the log2FC in DEG analysis.

**Activity of TCF7/LEF1 regulons in bulk RNA-seq data**

Top induced targets of TCF7/LEF1, defined by high confidence EP regression (regression coefficient > 0.3) and log2FC > 0.5 in DE analyses were supplied as input to signature scoring in 113 and 179 ETP and Near-ETP samples with corresponding bulk RNA-seq data. For signature scoring, a z-score was calculated for each feature. To obtain a sample-level Z-score, Z-scores for each feature were averaged. An identical analysis was repeated using predicted TF regulators of TCF7, LEF1, and CD5, identified by high confidence EP regression (regression coefficient > 0.3) and log2FC > 0.5 in DE analyses.

**Pathway analyses using AUCell**

Pathway enrichment scores for gene signatures (1) defined from our single cell analysis or (2) downloaded from MSigDB were performed with AUCell v1.12.016. Upregulated pathways within scRNA-seq data were determined using the FindMarkers function in Seurat v4.0.5.

**Cell cycle analyses in sc-sequenced ETP-ALL patients**

Cell cycle signature scoring and phase classification was performed on 10 High MRD and 10 MRD negative ETP patients using the *CellCycleScoring* function in Seurat v4.0.5 with default parameters. 43 S-Phase and 54 G2M phase signature genes17 were provided as input, as described in the default use case of the CellCycleScoring function. Cells were then randomly downsampled so that each patient would be represented by an equal cell number (3,350 per patient and 33,500 per group). The proportion of cycling (S-Phase) cells was compared in each group using the *prop.test* function. As a second line of evidence for enrichment of cycling cells in MRD negative patients, differential expression analyses using 43 S-Phase genes17,18 was performed using the Wilcoxon rank-sum test with Bonferroni multiple testing correction.

**BMP-like DE analyses**

BMP-like and T-specified DEGs were computed using the *FindMarkers* function in Seurat v4.0.5 with the following parameters: assay = RNA, logfc.threshold =0 (returns all genes), ident.1 = T-specified-R (T-specified blasts from 10 MRD negative patients), ident.2 = BMP-like-NR (BMP-like blasts from 15 MRD+ patients), max.cells.per.ident = 5,000. The input matrix to differential expression was a matrix of G1-phase ETP-ALL blasts with equal number of cells per patient (1,711 per patient and 42,775 cells total). To identify DE-TFs and DE surface markers, the same process was repeated with using genes encoding human transcription factors19,20 (feature = TFs) and change of assay to log-normalized ADT count matrix (assay = ADT).

**Intersection of DE-TF and DA-Motifs**

DE transcription factors from scRNA-seq data, defined by average log2FC > 0.15 & FDR < 0.001, were intersected with DA TF motifs from scATAC-seq data. DA TF motifs were defined by >0.0025 Δ median chromVAR deviation score, FDR < 0.001, >20% cell expression of corresponding TF, and ratio of median and mean chromVAR deviation score between 0.7 and 1.3. In the case of analyses involving intersected TFs, no downsampling was performed to get the most accurate log2FC and Δ chromVAR deviation score from scRNA-seq and scATAC-seq data, respectively.

***WGS and WES Mapping***

Paired-end sequencing reads were aligned to the human Hg38-GDC reference using BWA-MEM21.

***SNV/Indel detection***

An ensemble strategy was used to identify somatic mutations (SNVs/indels) using multiple established tools, including Mutect222 (v4.1.2.0), SomaticSniper 23(v1.0.5.0), VarScan224 (v2.4.3), MuSE25 (v1.0rc), and Strelka226 (v2.9.10). Annovar27 was used for variant annotation. These consensus calls underwent manual assessment and filtering, as follows: (1) Somatic mutations called by at least two platforms were considered reliable. (2) Somatic mutations called by at least two tools were considered reliable. (3) Variants initially called by a single tool were retained following thorough quality evaluation with emphasis for genes frequently mutated in T-ALL. Furthermore, read depth, mapping quality, and strand bias, was used to eliminate additional artifacts.

***Somatic copy number alteration detection***

Somatic copy number alterations (SCNAs) were identified through CONSERTING28. The raw calls were filtered: (1) CNV alterations on centromeres and telomeres were excluded (2) TCR, IGH, IGL, IGK CNVs were excluded, if both breakpoints were within the loci. Conserting Log ratio>0.3 and >0.7 was used as cutoffs for CNV gain and amplification and -0.4 and -1.4 for CNV loss and deletion. Variants with Conserting DMean>1.3 for gains or DMean<0.7 for losses and diploid germline CNV were considered high confidence. Other variants underwent manual review.

***Structural variant detection***

For somatic structural variants (SVs), four distinct SV callers were utilized to generate a comprehensive set of SV events: Delly29 (v0.8.2), Manta (v1.5.0), GRIDSS30 (v2.5.0), LUMPY31 (v0.3.0). SV calls that met the default quality filters of each caller were merged into a combined set of SVs using SURVIVOR32 (v1.0.7) and SVtyper33 (v0.7.1) was used for then genotyping. The intersected call sets were filtered and manually evaluated. This involved considering the support from discordant and soft-clipped read counts (with a count threshold of ≥10) at both ends of potential structural variant (SV) sites. Furthermore, low germline sample soft-clipped and discordant read counts (<3) were considered. In cases with tumor in normal contamination, germline read counts were not used for filtering, and in instances with low blast percentages, only ≥3 soft-clipped and discordant read counts were required. Furthermore, SV detection was performed in a tumor-only mode to ensure the inclusion of variants in cases with tumor in normal contamination. TCR, IGH, IGL, IGK SVs were excluded, if both breakpoints were within these loci.

***RNA Fusions and SNV/Indel***

Fusion genes were detected using Arriba34, Fusioncatcher35, Pizzly36, SQUID37, STAR-fusion38. Fusions were used for validating WGS calls and remaining fusions were manually reviewed. GATK4 was used for detecting SNV/Indel for RNAseq and ANNOVAR was used for annotation. RNAseq SNV/Indel calls were used for WGS/WES variant validation.

**Identification of driver mutations in BMP-high and T-specified-High patients**

25 ETP samples were binarized into high-BMP-like (BMP-like> 25%) and T-specified-high (T-specified > 50%) groups and corresponding mutations visualized. For 391 mutant genes in 25 ETP patients subject to single cell sequencing, the number of samples carrying mutations was quantified and the mean BMP-like proportion and T-specified proportion was calculated. Mutant genes observed in >= 2 samples with average VAF > 0.1 were plotted for visualization. Classification of genes were derived from previous bulk genomics study on ETP-ALL39.

25 ETP samples were binarized into high-BMP-like (BMP-like> 25%) and T-specified-high (T-specified > 50%) groups and corresponding driver fusions visualized. For each driver fusion in 25 ETP patients subject to single cell sequencing, the mean BMP-like proportion, the mean T-specified proportion, the percentage of patients with EOI MRD+ was calculated. Fusion drivers observed in all 25 sc-sequenced patients were plotted for scatterplot visualization.

**Generation of cell x variant matrices via IronThrone**

Samples were demultiplexed into FASTQ files via bcl2fastq. FASTQ files were then processed using Ironthrone v2.1 with the default parameters and inputs for 10x v3.1 scRNA-seq data. Specifically, for each variant, Ironthrone was run in circularization mode *(--run = circ*) with UMI length 12 *(--umilen 12*) and cell barcodes from each sample’s cellranger output *(--whitelist sample.specific.barcodes.tsv*). For each sample, custom configuration files were created based on primer, mutant, and WT sequences to parse R1 and R2 FASTQ files, following the configuration set within IronThrone v2.1 documentation (https://github.com/dan-landau/IronThrone-GoT).

**Identification of NOTCH1 mutant and WT cells in scRNA-seq**

UMI concatenated summary tables outputted by IronThrone v2.1 were further filtered based on cell barcode and UMI combinations seen in 10x Cellranger output. Filtered cell x variant tables were then imported into R and intersected with high quality cells retained in scRNA-seq analysis. We then established a stringent threshold for identifying mutant cells for each variant, taking cells exceeding 90th percentile of mutant UMI noted in non-blast populations (T/NK, B, myeloid, and progenitor). For each cell barcode, mutant calls were then concatenated and the number of unique mutations summed. We observed a small proportion (n=142 / 9172; 1.54%) of cell barcodes that mapped to 3 (n=111) or 4 (n=31) unique mutations. Although biologically plausible that cells could have two mutations in the same allele, we were unable to rule out PCR induced mutation in the cell barcode / UMI for these cells and thus filtered this small fraction of cells from downstream analyses.

**Comparison between NOTCH1 mutant and NOTCH1 WT ETP blasts**

To investigate the association between NOTCH1 mutation status and cell state at a single cell level, genotyped cells were first scored using 66 BMP-like DEGs and 53 T-specified DEGs from BMP-119 using AUCell16 v1.12.0. BMP-like signature (BMP-119) and T-specified signature were then Z-transformed on a per-sample basis and then compared in three different analyses: WT vs Mutant; WT vs 1 NOTCH-mut vs 2 NOTCH-mut; regression against # of mutant UMI. For the binary comparisons, two-sided Mann-Whitney tests (*wilcox.test*) were used to compare WT vs Mutant; WT vs 1 NOTCH-mut vs 2 NOTCH-mut. For regression analysis, linear regression was plotted using the *geom_smooth* function with method set to ‘lm’. Correlation coefficient and p-value were calculated using the *stat_cor* function with method set to Pearson.

**Identification of non-malignant ETPs with BMP-like transcriptional state**

Our goal was to identify non-malignant counterparts to BMP-like ETP blasts (n-ETPs). We first compared HSPC/LMPP projected ETP blasts from High MRD patients to healthy HSPC/LMPP and healthy Pro-T cells using the *FindMarkers* function in Seurat v4.0.5. The input matrix to differential expression was a concatenated matrix of healthy donor and T-ALL patient cells. As a second line of evidence to identify n-ETPs with BMP features, n-ETPs were projected alongside n-BMPs in a UMAP reduction that utilized unsupervised feature selection with default parameters (n=2,000 features, PCs 1:50). n-ETPs that projected onto n-BMPs were labeled as BMP-like ETPs. To visualize BMP-like ETPs in the context of early thymocyte development, flow-sorted CD34+ CD1A- thymocytes (containing BMP-like ETPs, T-specified ETPs and Pro-T cells) were subset and subject to UMAP dimension reduction with 2,000 features (default) and top 50 PCs as input. In both dimension reductions, total UMI (nCount_RNA) and percent mitochondrial reads were regressed out during Z-score scaling of data, occurring before PCA dimension reduction. Finally, to validate transcriptomic similarity between BMP-like n-ETPs and BMP-like T-ALL blasts, Z-score based signature scoring was performed using BMP-like DEGs, BMP-like DE TFs, T-specified DEGs and T-specified TFs obtained from cancer blast derived single cell data. For cells of the CD34+ CD1A- thymocyte sort, the mean Z-score of genes in each DEG signature were calculated on a per-cell basis, and signature scores from BMP-like ETPs, T-specifying ETPs, and Pro-T cells were compared using Wilcoxon rank-sum test.

**Bulk RNA-seq based differential expression analyses in Non-ETP ALL**

Differential expression between 259 MRD+ and 616 MRD– bulk-sequenced diagnostic Non-ETP samples from AALL0434 was performed using Linear Models for Microarray Data (Limma40,41) v3.46.0. For plotting, DE Genes and DE TFs with log2FC > 1, FDR < 0.01 were highlighted.

**Identification of BMP-like blasts in Non-ETP patients**

Pre-Committed blasts in 10 Non-ETP patients (6 EOI MRD- patients, 7,152 Pre-Committed blasts; 4 EOI MRD+ patients, 11,047 Pre-Committed blasts) were subsetted (total, 52,971 blasts and 15,830 blasts respectively) and mean proportions for corresponding cell fractions (BMP-like, MEP-like, and Pro-T-like) were quantified in each patient. The mean proportion of each cell type for patients of each group was plotted, with proportion of BMP-like blasts in MRD- vs MRD+ patients being compared using the *prop.test* function.

**Single cell signature based stratification of AALL0434 & AALL1231 Non-ETP patients**

Pre-Commit and Post-Commit DEGs were computed using the *FindMarkers* function in Seurat v4.0.5 with the following parameters: assay = RNA, logfc.threshold =0 (returns all genes), ident.1 = Post-Commit-R (Post-Commit blasts from 5 CR patients), ident.2 = Pre-Commit-NR (Pre-Commit blasts from 5 relapsed/refractory patients), max.cells.per.ident = 500. The input matrix to differential expression was a matrix of G1-phase Non-ETP T-ALL blasts with maximum n=5,000 cells per patient (34,384 cells total). To identify DE TFs and DE surface markers, the same process was repeated with using genes encoding human transcription factors19,20 (feature = TFs) and change of assay to log-normalized ADT count matrix (assay = ADT).Pre-Commit and Post-Commit DEGs were stringently filtered using FDR < 0.001, average Log2FC > 0.5 cutoffs, leaving 216 Pre-Commit DEGs and 130 Post-Commit DEGs. Due to gender biases noted in our single-cell cohort, DEGs located on the x and y chromosomes were filtered out to retain the core biology of both cell fractions. Z-score based signature scoring was performed on 1,051 bulk-sequenced diagnostic Non-ETP T-ALL patients with BMP-like DEGs as positive features, and T-specified DEGs as negative features. The same process was repeated for BMP-like (BMP-like blasts from 5 relapsed/refractory patients) vs. Post-Commit (Post-Commit blasts from 5 CR patients) cell fractions, identifying leaving 422 BMP-like DEGs and 168 Post-Commit DEGs. To validate these two signatures obtained from single cell data, we performed Z-score based signature scoring on bulk-sequenced diagnostic Non-ETP samples from two independent COG trials (AALL0434, fully sequenced, n = 1051; AALL1231, partially sequenced, n = 75) using BMP-like DEGs or Pre-Commit DEGs as positive features, and corresponding Post-Commit DEGs as negative features. To test if signatures could stratify patient OS, we binarized both sets of patients based on signature score and utilized Cox Proportional Hazard model Day 29 MRD taken as a covariate using the *survfit* function from survival v3.2-1342: *survfit(Surv(time.OS, status.OS) ~ high.BMP + D29.MRD*. For AALL0434, the top 50% (n= 526) of Non-ETP patients were compared with the bottom 50% (n=525) of patients; for AALL1231, the top 50% of all sequenced patients (n=38) were compared with the bottom 50% (n= 37).

**Identification of a consensus BMP-like surface marker signature**

Differentially Expressed Antibody Derived Tags (ADT) from ETP-ALL BMP-like blasts (n=13, BMP-like vs T-specified, 6 positive, 7 negative) and Non-ETP BMP-like blasts (n=18, BMP-like vs Post-Commit, 9 positive, 9 negative) were overlapped and average Log2FC calculated. 9 genes with abs(log2FC > 0.5) (5 with positive expression, 4 with negative expression) were retained as a consensus “BMP-Surface-9” signature. To contextualize BMP-surface-9 marker genes within normal hematopoiesis, we performed AUC based signature scoring healthy donor scRNA-seq reference maps in addition to individually plotting BMP-surface-9 gene expression. To test the clinical significance of the BMP-surface-9 signature, we performed Z-score based signature scoring on bulk RNA-sequenced diagnostic T-ALL samples from two independent COG trials (AALL0434, fully sequenced, n = 1051; AALL1231, partially sequenced, n = 57) using BMP-surface-9 DEGs. We binarized patients based on signature score and utilized Cox Proportional Hazard model Day 29 MRD taken as a covariate using the *survfit* function from survival v3.2-1342: *survfit(Surv(time.OS, status.OS) ~ high.BMP + D29.MRD*. In each case, the top 50% of patients were compared with the bottom 50%. Survival analyses were performed also by subsetting patients from AALL0434 into their individual subtypes: ETP (n=110), Near-ETP (n=168) and Non-ETP (including Non-ETP and Non-Subtyped, n=1057).

**Identification of physiological expression patterns of BMP-17 and BMP-Surface-9**

To contextualize BMP-17 and BMP-surface-9 marker genes within normal hematopoiesis, we performed AUC based signature scoring healthy donor scRNA-seq reference maps using AUCell v1.12.0. Genes were ranked within each cell using the *AuCell_buildRankings* function with and signature AUC was calculated using AUCell_calcAUC with default suggested parameters. For building cell rankings, parallelization was utilized (nCores = 12); for calculating AUC, the top 10% of expressed genes considered for computational efficiency (aucMaxRank = 0.1). BMP-Surface-9 marker genes were divided into positive DEGs (n=4) and negative DEGs (n=5) and AUC were calculated for each gene set. Overall enrichment (ie, aggregate AUC) of the BMP-surface-9 signature was then calculated by taking the difference in AUC between positive-surface and negative-surface markers. Signature AUC for BMP-17, aggregate BMP-surface-9, positive-BMP-surface-markers, and negative-BMP-surface-markers was visualized within our healthy donor scRNA-seq reference map using the *FeaturePlot* function in Seurat v4.0.5. To supplement AUC-based signature scoring, the depth/UMI-normalized RNA expression level of BMP-17 and BMP-surface-9 marker genes was also visualized using the *FeaturePlot* function in Seurat v4.0.5.

**Supplementary Methods Table 1: Antibodies used in T-ALL CITE-seq**

| Antibody | Clone | Lot # | Cat# | sequence |
| --- | --- | --- | --- | --- |
| anti-CD3 |  |  |  | CTCATTGTAACTCCT |
| anti-CD19 |  |  |  | CTGGGCAATTACTCG |
| anti-CD14 |  |  |  | CAATCAGACCTATGA |
| anti-CD33 |  |  |  | TAACTCAGGGCCTAT |
| anti-CD34 |  |  |  | GCAGAAATCTCCCTT |
| anti-CD117 |  |  |  | AGACTAATAGCTGAC |
| anti-CD10 |  |  |  | CAGCCATTCATTAGG |
| anti-CD123 |  |  |  | CTTCACTCTGTCAGG |
| anti-CD7 |  |  |  | TGGATTCCCGGACTT |
| anti-CD4 |  |  |  | TGTTCCCGCTCAACT |
| anti-CD8A |  |  |  | GCTGCGCTTTCCATT |
| anti-CD56 |  |  |  | TTCGCCGCATTGAGT |
| anti-CD5 |  |  |  | CATTAACGGGATGCC |
| anti-HLA-DR |  |  |  | AATAGCGAGCAAGTA |
| anti-CD66B |  |  |  | AGCTGTAAGTTTCGG |
| anti-CD2 |  |  |  | TACGATTTGTCAGGG |
| anti-CD45 |  |  |  | TGCAATTACCCGGAT |
| anti-CD15 |  |  |  | TCACCAGTACCTAGT |
| anti-CD22 |  |  |  | GGGTTGTTGTCTTTG |
| anti-CD1A |  |  |  | GATCGTGTTGTGTTA |
| anti-CD38 |  |  |  | CCTATTCCGATTCCG |
| anti-CD94 |  |  |  | CTTTCCGGTCCTACA |

**Supplementary Methods Table 2: Antibodies used in sorting of healthy thymocytes**

| **Antibody** | **Vendor** | **Clone** | **Cat #** | **Lot #** | **Fluorophore** |
| --- | --- | --- | --- | --- | --- |
| anti-CD34 | Biolegend | 561 | 343607 | B273991 | APC |
| anti-CD1A | Biolegend | HI149 | 300105 | B263720 | PE |
| anti-CD235A | Biolegend | HI264 | 349103 | B277415 | FITC |
| anti-CD56 | Biolegend | 5.1H11 | 362545 | B263356 | FITC |
| anti-CD4 | Biolegend | RPA-T4 | 300505 | B283934 | FITC |
| anti-CD16 | Biolegend | 3G8 | 302005 | B309216 | FITC |
| anti-CD8A | Biolegend | RPA-T8 | 301005 | B275512 | FITC |
| anti-CD19 | Biolegend | HIB19 | 302205 | B265558 | FITC |
| anti-CD3 | Biolegend | HIT3a | 300306 | B274310 | FITC |

**Supplementary Methods Table 3: Antibodies used in determining PDX engraftment**

| **Antibody** | **Vendor** | **Cat #** | **Fluorophore** |
| --- | --- | --- | --- |
| anti-CD7 | biolegend | 343106 | PE |
| anti-CD38 | ebioscience | 12-0388-42 | PE |
| anti-hCD45 | BD Biosciences | 561864 | APC |

**Supplementary Methods Table 4: Primers used for Genotyping of Transcriptomes**

| **Primer Names/Targets** | **Primer sequence (5' -> 3')** |
| --- | --- |
| **Universal Primers** | |
| P5generic | AATGATACGGCGACCACCGAGATCTACAC |
| RPI-X | CAAGCAGAAGACGGCATACGAGAT*XXXXXX*GTGACTGGAGTTCCTTGGCACCCGAGAATTCCA |
|  |  |
| **Circularization GoT - Gibson handles** | |
| Universal_CircGoT_PCR1 - Gibson | GGAACGGTACATACTTGCTCCTACACGACGCTCTTCCGATCT |
| Universal_CircGoT_PCR3 | AATGATACGGCGACCACCGAGATCTACACTCTTTCCCTACACGACGCTC |
| Handle PCR1 - Gibson | GAGCAAGTATGTACCGTTCC -[Gene Specific Primer] |
| Handle PCR2_fw - Gibson | AGATCCATTTAGGGATGCCC -[Gene Specific Primer] |
| Handle PCR2_ rv - Gibson | GGGCATCCCTAAATGGATCT -[Gene Specific Primer] |
| Handle PCR3 - Gibson | CCTTGGCACCCGAGAATTCCA -[Gene Specific Primer] |
|  |  |
| **Circularization GoT - Gene Specific Primers** | |
| **NOTCH1.pV1578del** | |
| PCR#1 | [PCR_handle]- AGTGGGACGGGCTGGACTGT |
| PCR#2_Foward | [PCR_handle]- CCGCAGGAAGTGGAAGGAGC |
| PCR#2_Reverse | [PCR_handle]- CAGATGCGTCCCAAGATGTTG |
| PCR#3 | [PCR_handle]- CATGTACCCGAGAGGCTGGC |
|  |  |
| **NOTCH1.pA1701P** | |
| PCR#1 | [PCR_handle]- CGTCTACCTGGAGATTGACAACC |
| PCR#2_Foward | [PCR_handle]- GTAGGGGATGTTGAGGCTGC |
| PCR#2_Reverse | [PCR_handle]- CAGATGCGTCCCAAGATGTTG |
| PCR#3 | [PCR_handle]- GCTTCCAGAGTGCCACCGAC |
|  |  |
| **NOTCH1.pQ2409P/ pQ2409fs** | |
| PCR#1 | [PCR_handle]- GCAGCCACAAAACTTACAGATGC |
| PCR#2_Foward | [PCR_handle]- ACGCCAAGGTGCGGCTGTG |
| PCR#2_Reverse | [PCR_handle]- CAGATGCGTCCCAAGATGTTG |
| PCR#3 | [PCR_handle]- GCAGCCAGCAAACATCCAGC |
|  |  |
| **NOTCH1.pP2462fs/ pP2461_P2462delinsX/pL2472fs** | |
| PCR#1 | [PCR_handle]- TCCTGAGTGGAGAGCCGAGC |
| PCR#2_Foward | [PCR_handle]- AGGAACTGGGCTGCGGTCAC |
| PCR#2_Reverse | [PCR_handle]- CAGATGCGTCCCAAGATGTTG |
| PCR#3 | [PCR_handle]- CTGGCGGTGCACACTATTCTG |
